# Supplementary material
Source: publisher site journal article supplement (https://kjim.org/upload/media/kjim-2022-326-Supplementary-Table-3.pdf)
Supplement: Supplementary file 1 [file kjim-2022-326-Supplementary-Table-3.pdf]

**Supplementary Table 3. The primary and secondary outcome of patients treated by HF specialist and non-HF specialist**

| Outcome                                                                  | HF specialist (n = 103) | Non-HF specialist (n = 312) | <i>p</i> value |
|--------------------------------------------------------------------------|-------------------------|-----------------------------|----------------|
| Primary outcome                                                          |                         |                             |                |
| 2 months composite of readmission or all cause death                     | 6 (5.8)                 | 27 (8.7)                    | 0.358          |
| Secondary outcome                                                        |                         |                             |                |
| 2 months readmission                                                     | 5 (4.9)                 | 18 (5.8)                    | 0.725          |
| 2 months all cause death                                                 | 1 (1.0)                 | 11 (3.5)                    | 0.180          |
| 2 months lost to follow-up and survive                                   | 6 (5.8)                 | 6 (1.9)                     | 0.081          |
| 2 months composite of readmission, all cause death and lost to follow-up | 12 (11.7)               | 33 (10.6)                   | 0.761          |

Values are presented as number (%).

HF, heart failure.
